# Supplementary material
Source: PubMed Central journal article supplement (PMC3539753)
Supplement: NIHMS430005-supplement-supplement_1.pdf [file NIHMS430005-supplement-supplement_1.pdf]

**Table E1.**

**Annals Journal Club Issue (Questions printed in the listed issue with Answers printed 5 months following Questions)**

**Used with permission of Tyler Barrett, MD, MSCI; David Schriger, MD, MPH**

|                                                                                                                                                                                                                                                                                                                                                                                                                                                                                                                                                                                         | Month/Year             | Methodology/Statistics Topics                                                                                                                                                                                                                                                                                                                                                                                                                                                                                                     | Clinical Topics                                                                                                             | Epidemiology Topics                                                                               |
|-----------------------------------------------------------------------------------------------------------------------------------------------------------------------------------------------------------------------------------------------------------------------------------------------------------------------------------------------------------------------------------------------------------------------------------------------------------------------------------------------------------------------------------------------------------------------------------------|------------------------|-----------------------------------------------------------------------------------------------------------------------------------------------------------------------------------------------------------------------------------------------------------------------------------------------------------------------------------------------------------------------------------------------------------------------------------------------------------------------------------------------------------------------------------|-----------------------------------------------------------------------------------------------------------------------------|---------------------------------------------------------------------------------------------------|
| <b>Measures of Emergency Department Crowding, Odds Ratios, and the Dangers of Making Continuous Data Categorical</b><br><b>Refers to Article below:</b><br>Emergency Department Crowding Is Associated With Poor Care for Patients With Severe Pain<br>Jesse M. Pines, Judd E. Hollander<br><br>Annals of Emergency Medicine<br><br>January 2008 (Vol. 51, Issue 1, Pages 1-5)                                                                                                                                                                                                          | <b>January 1, 2008</b> | RETROSPECTIVE COHORT DESIGN PRO/CONS                                                                                                                                                                                                                                                                                                                                                                                                                                                                                              | ADMINISTRATION OF ANALGESIA                                                                                                 |                                                                                                   |
|                                                                                                                                                                                                                                                                                                                                                                                                                                                                                                                                                                                         |                        | PROSPECTIVE COHORT DESIGN PRO/CONS<br>DISTRIBUTIONS OF A CONTINUOUS VARIABLE (MEAN VS. MEDIAN VS. MODE)<br>CONVERTING CONTINUOUS VARIABLES TO CATEGORICAL<br>GRAPHICS FOR DISPLAYING DISTRIBUTIONS (HISTOGRAMS)<br>INTERNAL VS. EXTERNAL VALIDITY<br>ODDS RATIO DEFINITION/ASSUMPTIONS<br>INTERPRETING ODDS RATIOS                                                                                                                                                                                                                | PREDICTORS OF ANALGESIA<br>IMPROVING APPROPRIATE ANALGESIA                                                                  |                                                                                                   |
| <b>Practical Considerations in HIV Testing in the Emergency Department, Characteristics of Diagnostic Tests, and the Role of Sensitivity Analysis in Observational Studies</b><br><b>Refers to Article below:</b><br>Patient Acceptance of Rapid HIV Testing Practices in an Urban Emergency Department: Assessment of the 2006 CDC Recommendations for HIV Screening in Health Care Settings<br>Jason S. Haukoos, Emily Hopkins, Richard L. Byyny, Denver Emergency Department HIV Testing Study Group<br>Annals of Emergency Medicine<br>March 2008 (Vol. 51, Issue 3, Pages 303-309) | <b>March 1, 2008</b>   | DEFINITION OF SENSITIVITY & SPECIFICITY<br>DEFINITION OF PREDICTIVE VALUES (POSITIVE & NEGATIVE)<br><br>DEFINITION OF ACCURACY<br><br>DEFINITION OF PRECISION<br><br>CALCULATING SAMPLE SIZE USING PRECISION (WIDTH OF CI) VS. POWER<br><br>RELATIONSHIP BETWEEN SAMPLE SIZE AND PRECISION FOR A SINGLE PROPORTION<br>BRIEF MENTION ON HYPOTHESIS TESTING AND DEFINITION OF POWER<br>DEFINITION OF CONFIDENCE INTERVALS<br>SAMPLING BIAS IN ED WAITING ROOM SURVEYS<br>SENSITIVITY ANALYSIS AND ITS ROLE IN OBSERVATIONAL STUDIES | RAPID HIV TESTS<br>SENS/SPECIFICITY<br>IMPACT OF PUBLIC HEALTH MEASURES ON ED THROUGHPUT<br>BARRIERS TO HIV SCREENING IN ED | INITIATING HIV SCREENING PROGRAMS<br><br>SCREENING TEST SENS VS. SPECIF PREFERRED (SPIN VS SNOUT) |

**Table E1.**

**Annals Journal Club Issue (Questions printed in the listed issue with Answers printed 5 months following Questions)**

**Used with permission of Tyler Barrett, MD, MSCI; David Schriger, MD, MPH**

|                                                                                                                                                                                                                                                                                                                                                                                                                                                                                                                                                                | Month/Year                 | Methodology/Statistics Topics                                                                                                                                                                                                                                                                                                                                                                                                                                                                                                                          | Clinical Topics                                                                                                                                                    | Epidemiology Topics                                                                                                                 |
|----------------------------------------------------------------------------------------------------------------------------------------------------------------------------------------------------------------------------------------------------------------------------------------------------------------------------------------------------------------------------------------------------------------------------------------------------------------------------------------------------------------------------------------------------------------|----------------------------|--------------------------------------------------------------------------------------------------------------------------------------------------------------------------------------------------------------------------------------------------------------------------------------------------------------------------------------------------------------------------------------------------------------------------------------------------------------------------------------------------------------------------------------------------------|--------------------------------------------------------------------------------------------------------------------------------------------------------------------|-------------------------------------------------------------------------------------------------------------------------------------|
| <p><b>Acutely Decompensated Heart Failure in a County Emergency Department: A Double-Blind Randomized Controlled Comparison of Nesiritide Versus Placebo Treatment</b></p> <p><b>Refers to Article below:</b></p> <p>Acutely Decompensated Heart Failure in a County Emergency Department: A Double-Blind Randomized Controlled Comparison of Nesiritide Versus Placebo Treatment<br/>Adam H. Miller, Shameem Nazeer, Paul Pepe, Barbi Estes, April Gorman, Clyde W. Yancy<br/>Annals of Emergency Medicine<br/>May 2008 (Vol. 51, Issue 5, Pages 571-578)</p> | <p><b>May 1, 2008</b></p>  | <p>PLACEBO CONTROLLED VS. PRAGMATIC TRIALS (COMPARING VS. CURRENT RX)<br/>DEFINITION OF CONFOUNDING<br/><br/>DRAWING CAUSAL DIAGRAMS<br/><br/>HUME THEORY ON CAUSATION<br/><br/>INTRO ON RANDOMIZATION (STRATEGIES/ BLOCKING)<br/>DISCUSSION REGARDING "TABLE 1" IN RCT (NO P VALUES)<br/>IMPACT OF INCLUSION/EXCLUSION CRITERIA ON GENERALIZABILITY OF RESULTS<br/>CLINICAL TRIAL REGISTRATION ADVANTAGES AND IMPORTANCE<br/>PUBLICATION BIAS INTRO<br/>INTRO TO CONSORT REQUIREMENTS (6-11)<br/>CHOOSING APPROPRIATE OUTCOME MEASURES IN A TRIAL</p> | <p>LIT REVIEW ON NESIRITIDE PHARMACEUTICAL RESOURCES FOR DRUG PRESCRIBING BEHAVIORS<br/>HF TREATMENT STRATEGIES<br/><br/>MECHANISM OF ACTION OF NESIRITIDE/BNP</p> | <p>TRIALS COMPARING DRUGS TO INADEQUATE CONTROLS<br/><br/>INTRO TO FDA DRUG APPROVAL PROCESS<br/>INTRO TO PHASE I TO III TRIALS</p> |
| <p><b>Risk Prediction With Procalcitonin and Clinical Rules in Community-Acquired Pneumonia</b></p> <p><b>Refers to Article below:</b></p> <p>Risk Prediction With Procalcitonin and Clinical Rules in Community-Acquired Pneumonia<br/>David T. Huang, Lisa A. Weissfeld, John A. Kellum, Donald M. Yealy, Lan Kong, Michael Martino, Derek C. Angus, GenIMS Investigators<br/>Annals of Emergency Medicine<br/>July 2008 (Vol. 52, Issue 1, Pages 48-58)</p>                                                                                                 | <p><b>July 1, 2008</b></p> | <p>THEORETICAL MODEL OF RESEARCH PROBLEM<br/>CREATING A SCHEMATIC CONCEPTUAL MODEL<br/><br/>CATEGORIZING CONTINUOUS VARIABLES<br/>CHOOSING APPROPRIATE OUTCOME MEASURES IN AN OBSERVATIONAL STUDY (SPECIFICALLY REASONABLE TEMPORAL RELATIONSHIP BETWEEN EXPOSURE AND OUTCOME)<br/>DEFINITION OF LIKELIHOOD RATIOS AND NOMOGRAMS<br/><br/>ADVANTAGES/DISADVANTAGES OF MULTICENTER TRIALS<br/>INTRO TO ODDS VS. PROBABILITY<br/>HUBERT-WHITE CLUSTERING FEATURE</p>                                                                                     | <p>VALUE OF PROCALCITONIN AND INFECTION</p>                                                                                                                        | <p>INDIVIDUAL STUDY SITE'S IMPACT ON MULTICENTER TRIAL RESULTS<br/>INTRO TO IDEA OF VALIDATING RESULTS</p>                          |

**Table E1.**

**Annals Journal Club Issue (Questions printed in the listed issue with Answers printed 5 months following Questions)**

**Used with permission of Tyler Barrett, MD, MSCI; David Schriger, MD, MPH**

|                                                                                                                                                                                                                                                                                                                                                                                                                                                                                                                                             | Month/Year        | Methodology/Statistics Topics                                                                                                                                                                                                                                                                                                                                                                                                                                                                                       | Clinical Topics                                                                                                      | Epidemiology Topics                                                          |
|---------------------------------------------------------------------------------------------------------------------------------------------------------------------------------------------------------------------------------------------------------------------------------------------------------------------------------------------------------------------------------------------------------------------------------------------------------------------------------------------------------------------------------------------|-------------------|---------------------------------------------------------------------------------------------------------------------------------------------------------------------------------------------------------------------------------------------------------------------------------------------------------------------------------------------------------------------------------------------------------------------------------------------------------------------------------------------------------------------|----------------------------------------------------------------------------------------------------------------------|------------------------------------------------------------------------------|
| <p><b>Out-of-Hospital Continuous Positive Airway Pressure Ventilation Versus Usual Care in Acute Respiratory Failure: A Randomized Controlled Trial</b></p> <p><b>Refers to Article below:</b></p> <p>Out-of-Hospital Continuous Positive Airway Pressure Ventilation Versus Usual Care in Acute Respiratory Failure: A Randomized Controlled Trial , 04 April 2008<br/>James Thompson, David A. Petrie, Stacy Ackroyd-Stolarz, Darrell J. Bardua<br/>Annals of Emergency Medicine<br/>September 2008 (Vol. 52, Issue 3, Pages 232-241)</p> | September 1, 2008 | <p>EXCEPTION TO INFORMED CONSENT REQUIREMENTS<br/>PROCESS FOR OBTAINING AN INFORMED CONSENT</p> <p>RESPONSIBLE CONDUCT OF RESEARCH (BELMONT REPORT/NUREMBERG CODE)<br/>DISCUSSION ON BLINDING IN TRIALS AND IMPACT ON OUTCOME</p> <p>BASIC DISCUSSION OF TABLE ORGANIZATION</p>                                                                                                                                                                                                                                     | <p>MECHANISM OF ACTION OF BIPAP/CPAP<br/>LIT REVIEW OF BIPAP/CPAP</p> <p>CONTRAINDICATIONS TO BIPAP/CPAP</p>         | <p>EMS SYSTEM ISSUES WITH CPAP UNITS/DEVICES<br/>EMS OUT OF SERVICE TIME</p> |
| <p><b>Empiric Antibiotic Therapy for Sepsis Patients: Monotherapy With <math>\beta</math>-Lactam or <math>\beta</math>-Lactam Plus an Aminoglycoside?</b></p> <p><b>Refers to Article below:</b></p> <p>Empiric Antibiotic Therapy for Sepsis Patients: Monotherapy With <math>\beta</math>-Lactam or <math>\beta</math>-Lactam Plus an Aminoglycoside?<br/>Richard Sinert, Leah Bright<br/>Annals of Emergency Medicine<br/>November 2008 (Vol. 52, Issue 5, Pages 557-560)</p>                                                            | November 1, 2008  | <p>DIFFERENCE BETWEEN SYSTEMATIC AND NARRATIVE REVIEW<br/>REQUIREMENTS FOR SYSTEMATIC REVIEW PROTOCOL<br/>DEFINITION OF META-ANALYSIS<br/>SEARCHING ELECTRONIC DATABASES</p> <p>DEFINITION OF QUASI-RANDOMIZED TRIALS<br/>EPISCOPE: POSSIBLE CAUSES OF BIAS IN SYSTEMATIC REVIEW</p> <p>RANDOM AND NONRANDOM CONFOUNDING/ MISSING DATA/PUBLICATION BIAS<br/>FURTHER DISCUSSION ON RANDOMIZATION ALLOCATION AND CONCEALMENT<br/>INTRO TO FIXED EFFECT VS. RANDOM EFFECTS MODEL<br/>ACCURACY VS. PRECISION FIGURE</p> | <p>PROS/CONS FOR SINGLE VS. MULTI DRUG THERAPY FOR SEPSIS</p> <p>ED CROWDING/BOARDING<br/>IMPACT ON PATIENT CARE</p> | <p>REASONING FOR PUBLISHING REPORT CARDS (GOVT REFORM)</p>                   |

**Table E1.**

**Annals Journal Club Issue (Questions printed in the listed issue with Answers printed 5 months following Questions)**

**Used with permission of Tyler Barrett, MD, MSCI; David Schriger, MD, MPH**

|                                                                                                                                                                                                                                                                                                                                                                                                                                                                                                                                                                                                                                                                                                                                                                                                   | Month/Year                    | Methodology/Statistics Topics                                                                                                                                                                                                                                                                                                                  | Clinical Topics                                                                                                                                                                                                                                              | Epidemiology Topics |
|---------------------------------------------------------------------------------------------------------------------------------------------------------------------------------------------------------------------------------------------------------------------------------------------------------------------------------------------------------------------------------------------------------------------------------------------------------------------------------------------------------------------------------------------------------------------------------------------------------------------------------------------------------------------------------------------------------------------------------------------------------------------------------------------------|-------------------------------|------------------------------------------------------------------------------------------------------------------------------------------------------------------------------------------------------------------------------------------------------------------------------------------------------------------------------------------------|--------------------------------------------------------------------------------------------------------------------------------------------------------------------------------------------------------------------------------------------------------------|---------------------|
| <p><b>The National Report Card on the State of Emergency Medicine</b></p> <p><b>Refers to Article below:</b></p> <p>The National Report Card on the State of Emergency Medicine: Evaluating the Emergency Care Environment State by State 2009 Edition<br/>Stephen K. Epstein, Jonathan L. Burstein, Randall B. Case, Angela F. Gardner, Sanford H. Herman, Jon Mark Hirshon, John W. Jermyn, Mary Pat McKay, James C. Mitchiner, William P. Sullivan, Mary Jo Wagner, Susan Beer, Laura Tiberi, Craig Price, Ron Cunningham, Dean Wilkerson, Marilyn Bromley, Marjorie Geist, Laura Gore, Cynthia A. Singh,<br/>Gordon Wheeler, Stacy F. Gleason, Jennifer Decker, Valerie M. Gwinner, Renee H. Schwalberg<br/>Annals of Emergency Medicine<br/>January 2009 (Vol. 53, Issue 1, Pages 4-148)</p> | <p><b>January 1, 2009</b></p> | <p>ASSIGNING WEIGHTS TO REPORT CARD MEASURES BASED ON IMPORTANCE<br/>SCORING METHODS USING CONTINUOUS VS. BINARY MEASURES</p> <p>GRADING METHODS PROS/CONS</p>                                                                                                                                                                                 | <p>ED CROWDING/BOARDING<br/>IMPACT ON RESIDENT<br/>EDUCATION<br/>ED CROWDING IMPACT ON MED<br/>STUDENT CHOICE OF EM<br/>COMPARING STATES ON THEIR<br/>EM ENVIRONMENT</p>                                                                                     |                     |
| <p><b>Clevidipine, an Intravenous Dihydropyridine Calcium Channel Blocker, Is Safe and Effective for Treatment of Patients With Acute Severe Hypertension</b></p> <p><b>Refers to Article below:</b></p> <p>Clevidipine, an Intravenous Dihydropyridine Calcium Channel Blocker, Is Safe and Effective for the Treatment of Patients With Acute Severe Hypertension , 06 June 2008<br/>Charles V. Pollack, Joseph Varon, Norman A. Garrison, Ramin Ebrahimi, Lala Dunbar, W. Frank Peacock<br/>Annals of Emergency Medicine</p>                                                                                                                                                                                                                                                                   | <p><b>March 1, 2009</b></p>   | <p>TRIAL REGISTRATION REFRESHER<br/>IMPORTANCE OF INCLUSION CRITERIA ON ENROLLMENT AND CONCLUSIONS</p> <p>LIMITATIONS OF SINGLE ARM, UNBLINDED, UNCONTROLLED TRIALS</p> <p>ETHICS OF PLACEBO CONTROLLED TRIALS</p> <p>PLACEBO VS. PRAGMATIC TRIALS</p> <p>DEFINITION OF INTENTION TO TREAT ANALYSIS &amp; ACTUAL TREATMENT &amp; COMPLETER</p> | <p>BARRIERS TO IMPLEMENTING<br/>HEALTH CARE REFORM<br/>JNC-7 AND ACEP POLICIES ON<br/>TREATING HTN W/O END<br/>ORGAN DAMAGE<br/>SAFETY PROFILE OF CLEVIDIPINE<br/>VS. OTHER HTN MEDS<br/>VALUE OF LVH ON ECG AS<br/>ACUTE MARKER OF END<br/>ORGAN DAMAGE</p> |                     |

**Table E1.**

**Annals Journal Club Issue (Questions printed in the listed issue with Answers printed 5 months following Questions)**

**Used with permission of Tyler Barrett, MD, MSCI; David Schriger, MD, MPH**

|                                                                                                                                                                                                                                                                                                                                                                                  | Month/Year          | Methodology/Statistics Topics                                                                                                                                                                                                                                                                                                                                                                                                                               | Clinical Topics                                                            | Epidemiology Topics |
|----------------------------------------------------------------------------------------------------------------------------------------------------------------------------------------------------------------------------------------------------------------------------------------------------------------------------------------------------------------------------------|---------------------|-------------------------------------------------------------------------------------------------------------------------------------------------------------------------------------------------------------------------------------------------------------------------------------------------------------------------------------------------------------------------------------------------------------------------------------------------------------|----------------------------------------------------------------------------|---------------------|
| March 2009 (Vol. 53, Issue 3, Pages 329-338)                                                                                                                                                                                                                                                                                                                                     |                     | ABSOLUTE RISK DIFFERENCE ANALYSIS WITH COMPLETER AND ITT METHODS<br>ROLE OF DATA AND SAFETY MONITORING BOARDS IN TRIALS<br>ROLE OF INDUSTRY SPONSOR IN CLINICAL TRIALS<br>INVESTIGATOR CONFLICTS OF INTEREST IN TRIALS<br>JOURNAL'S RESPONSIBILITY WITH PUBLISHING TRIALS WITH SIGNIFICANT FLAWS<br>UNBLINDING AND SOFT OUTCOME MEASUREMENTS (BIAS)                                                                                                         |                                                                            |                     |
| <b>Frequent Fliers, Internal and External Validity, and Problems With Making Continuous Variables Binary</b>                                                                                                                                                                                                                                                                     | <b>May 1, 2009</b>  | DISCUSSION ON PATIENT RECRUITMENT STRATEGIES<br>VENN DIAGRAM REPRESENTATION OF PATIENT POPULATIONS<br>DISCUSSION ON PATIENT RECRUITMENT AND IMPACT ON INTERNAL/EXTERNAL VALIDITY<br>ETHICS OF PATIENT RECRUITMENT<br><br>HIPAA'S IMPACT ON SUBJECT RECRUITMENT<br><br>REQUIREMENTS FOR WAIVER OF CONSENT<br>DISCUSSION ON DATA ANALYSIS FOR REPORTED ED VISITS AND MULTIPLIER EFFECT<br>CATEGORIZING CONTINUOUS VARIABLES<br>BRIEF MENTION OF TYPE II ERROR | TREATMENT OF FREQUENT FLIERS<br>PHYSICIAN BIAS IN TREATING FREQUENT FLIERS |                     |
| <b>Refers to Article below:</b><br><br>Comparisons of High Versus Low Emergency Department Utilizers in Sickle Cell Disease , 17 October 2008<br>Imoigele P. Aisiku, Wally R. Smith, Donna K. McClish, James L. Levenson, Lynne T. Penberthy, Susan D. Roseff, Viktor E. Bovbjerg, John D. Roberts<br>Annals of Emergency Medicine<br>May 2009 (Vol. 53, Issue 5, Pages 587-593) |                     |                                                                                                                                                                                                                                                                                                                                                                                                                                                             |                                                                            |                     |
| <b>A Consideration of the Measurement and Reporting of Interrater Reliability</b>                                                                                                                                                                                                                                                                                                | <b>July 1, 2009</b> | FOCUS ON MEASUREMENT OF RELIABILITY<br>DEFINITION OF RELIABILITY VS. VALIDITY<br>DEFINING CRITERION (GOLD) STANDARDS FOR VALIDITY<br>DEFINITION OF INTERQUARTILE RANGE                                                                                                                                                                                                                                                                                      |                                                                            |                     |
| <b>Refers to Article below:</b><br><br>Interrater Reliability and Accuracy of Clinicians and Trained Research Assistants Performing Prospective Data Collection in Emergency Department Patients With Potential Acute Coronary Syndrome , 30 January 2009                                                                                                                        |                     |                                                                                                                                                                                                                                                                                                                                                                                                                                                             |                                                                            |                     |

**Table E1.**

**Annals Journal Club Issue (Questions printed in the listed issue with Answers printed 5 months following Questions)**

**Used with permission of Tyler Barrett, MD, MSCI; David Schriger, MD, MPH**

|                                                                                                                                                                                                                                                                                                | Month/Year               | Methodology/Statistics Topics                                                                                                                                                                                                                                                                                                                                                                                                                                                                                                                                | Clinical Topics | Epidemiology Topics                                                                                 |
|------------------------------------------------------------------------------------------------------------------------------------------------------------------------------------------------------------------------------------------------------------------------------------------------|--------------------------|--------------------------------------------------------------------------------------------------------------------------------------------------------------------------------------------------------------------------------------------------------------------------------------------------------------------------------------------------------------------------------------------------------------------------------------------------------------------------------------------------------------------------------------------------------------|-----------------|-----------------------------------------------------------------------------------------------------|
| Carlos O. Cruz, Emily B. Meshberg, Frances S. Shofer, Christine M. McCusker, Anna Marie Chang, Judd E. Hollander<br>Annals of Emergency Medicine<br>July 2009 (Vol. 54, Issue 1, Pages 1-7)                                                                                                    |                          | DISCUSSION ON COHEN'S KAPPA<br>DERIVATION AND INTERPRETATION                                                                                                                                                                                                                                                                                                                                                                                                                                                                                                 |                 |                                                                                                     |
|                                                                                                                                                                                                                                                                                                |                          | RELIABILITY MEASURES FOR BINARY,<br>CATEGORICAL, AND CONTINUOUS DATA<br>DEFINITION OF CORRELATION COEFFICIENTS<br>AND INTERPRETATION<br>INTERCLASS CORRELATION<br>BLAND-ALTMAN GRAPHICS                                                                                                                                                                                                                                                                                                                                                                      |                 |                                                                                                     |
| <b>Outcome Measures, Interim Analyses, and Bayesian Approaches to Randomized Trials</b>                                                                                                                                                                                                        | <b>September 1, 2009</b> | QUALITIES OF AN IDEAL OUTCOME MEASURE<br>DISCUSSION OF PATIENT CENTERED VS.<br>SURROGATE VS. BIOMARKERS OUTCOMES<br>(PROS AND CONS)                                                                                                                                                                                                                                                                                                                                                                                                                          |                 | DIFFERENT RESULTS<br>FROM SIMILAR STUDIES<br>IN DIFFERENT PATIENT<br>POPULATIONS (CLINIC<br>VS. ED) |
| <b>Refers to Article below:</b>                                                                                                                                                                                                                                                                |                          | BRIEF DEFINITION OF CONSTRUCT AND<br>CRITERION VALIDITY<br>CHOICE OF OUTCOME IN SMALL CLINICAL<br>TRIALS                                                                                                                                                                                                                                                                                                                                                                                                                                                     |                 |                                                                                                     |
| Tamsulosin for Ureteral Stones in the<br>Emergency Department: A Randomized,<br>Controlled Trial , 06 February 2009<br>Robinson M. Ferre, Jessica N. Wasielewski,<br>Tania D. Strout, Andrew D. Perron<br>Annals of Emergency Medicine<br>September 2009 (Vol. 54, Issue 3, Pages 432-<br>439) |                          | DISADVANTAGES OF DICHOTOMIZING A<br>CONTINUOUS VARIABLE<br>MENTION OF MISCLASSIFICATION BIAS<br>PROS AND CONS OF COMPOSITE OUTCOME<br>MEASURES AND INTERPRETATION OF<br>INDIVIDUAL CONSTITUENTS<br>PROS AND CONS OF SECONDARY OUTCOME<br>MEASURES<br>INTERPRETING SECONDARY OUTCOME<br>RESULTS<br>REFERRAL BIAS<br>DETAILED DISCUSSION ON VARIOUS<br>RANDOMIZATION STRATEGIES<br>IMPACT ON LACK OF PLACEBO/BLINDING ON<br>OUTCOME (CONFOUNDING BY INDICATION)<br>RECOMMENDATIONS FOR PERFORMING A<br>PLACEBO CONTROLLED TRIAL<br>MENTION OF HAWTHORNE EFFECT |                 |                                                                                                     |

**Table E1.**

**Annals Journal Club Issue (Questions printed in the listed issue with Answers printed 5 months following Questions)**

**Used with permission of Tyler Barrett, MD, MSCI; David Schriger, MD, MPH**

|                                                                                                                                                                                                                                                                                                                                                                                                      | Month/Year              | Methodology/Statistics Topics                                                                                                                                                                                                                                                                                  | Clinical Topics                                                                                | Epidemiology Topics |
|------------------------------------------------------------------------------------------------------------------------------------------------------------------------------------------------------------------------------------------------------------------------------------------------------------------------------------------------------------------------------------------------------|-------------------------|----------------------------------------------------------------------------------------------------------------------------------------------------------------------------------------------------------------------------------------------------------------------------------------------------------------|------------------------------------------------------------------------------------------------|---------------------|
|                                                                                                                                                                                                                                                                                                                                                                                                      |                         | DEFINITION OF INTERIM MONITORING BY DSMB VS. INTERIM ANALYSIS AND ASSOCIATED PROS AND CONS<br>NEED TO ADJUST SAMPLE SIZE FOR INTERIM ANALYSIS AND DISCUSSION OF VARIOUS TECHNIQUES<br>STOPPING RULES<br>INTRODUCTION TO BAYESIAN STATISTICS AND INTERPRETATION<br>ADAPTIVE BAYESIAN STUDY DESIGN PROS AND CONS |                                                                                                |                     |
| <b>Clinical Prediction Rules</b>                                                                                                                                                                                                                                                                                                                                                                     | <b>November 1, 2009</b> | FOCUS ON CLINICAL PREDICTION RULES PROS AND CONS OF PREDICTION MODELLING                                                                                                                                                                                                                                       | INCORPORATING PREDICTION RULES INTO CLINICAL PRACTICE<br>RADIATION EXPOSURE IN TRAUMA PANSCANS |                     |
| <b>Refers to Article below:</b>                                                                                                                                                                                                                                                                                                                                                                      |                         | PROPER DEVELOPMENT, VALIDATION AND INTERPRETATION OF PREDICTION RULES CONFIDENCE INTERVALS DISCUSSION                                                                                                                                                                                                          |                                                                                                |                     |
| The Out-of-Hospital Validation of the Canadian C-Spine Rule by Paramedics , 27 April 2009<br>Christian Vaillancourt, Ian G. Stiell, Tammy Beaudoin, Justin Maloney, Andrew R. Anton, Paul Bradford, Ed Cain, Andrew Travers, Matt Stempien, Martin Lees, Doug Munkley, Erica Battram, Jane Banek, George A. Wells<br>Annals of Emergency Medicine<br>November 2009 (Vol. 54, Issue 5, Pages 663-671) |                         | INTREPRETING RULE'S PERFORMANCE GIVEN A SMALL OCCURRENCE OF EVENTS IN VALIDATION COHORT                                                                                                                                                                                                                        |                                                                                                |                     |
| <b>The Conduct and Reporting of Meta-Analyses of Studies of Diagnostic Tests, and a Consideration of ROC Curves January 1, 2010</b>                                                                                                                                                                                                                                                                  | <b>January 1, 2010</b>  | PRISMA protocols on Conducting Reviews and Meta-Analyses                                                                                                                                                                                                                                                       | Imaging options for suspected appendicitis                                                     |                     |
| <b>Refers to Article below:</b>                                                                                                                                                                                                                                                                                                                                                                      |                         | Review of ROC curves<br>Review of Summary ROC curves                                                                                                                                                                                                                                                           |                                                                                                |                     |
| Diagnostic Accuracy of Noncontrast Computed Tomography for Appendicitis in Adults: A Systematic Review<br>Veronica Hlibczuk, Judith A. Dattaro, Zhezhen Jin, Louise Falzon, Michael D. Brown<br>Annals of Emergency Medicine<br>January 2010 (55, Issue 1, Pages 60-61)                                                                                                                              |                         | Problems with pooling sensitivity and specificity values                                                                                                                                                                                                                                                       |                                                                                                |                     |

**Table E1.**

**Annals Journal Club Issue (Questions printed in the listed issue with Answers printed 5 months following Questions)**

**Used with permission of Tyler Barrett, MD, MSCI; David Schriger, MD, MPH**

|                                                                                                                                                                                                                                                                                                                                                                                                                                                                                                                                                                                                                                                                               | Month/Year           | Methodology/Statistics Topics                                                                                                                                                                                                                                                                                                             | Clinical Topics                                                                                                                                                                                                          | Epidemiology Topics |
|-------------------------------------------------------------------------------------------------------------------------------------------------------------------------------------------------------------------------------------------------------------------------------------------------------------------------------------------------------------------------------------------------------------------------------------------------------------------------------------------------------------------------------------------------------------------------------------------------------------------------------------------------------------------------------|----------------------|-------------------------------------------------------------------------------------------------------------------------------------------------------------------------------------------------------------------------------------------------------------------------------------------------------------------------------------------|--------------------------------------------------------------------------------------------------------------------------------------------------------------------------------------------------------------------------|---------------------|
| <p><b>Is the Golden Hour Tarnished? Registries and Multivariable Regression March 1, 2010</b><br/><b>Refers to Article below:</b></p> <p>Emergency Medical Services Intervals and Survival in Trauma: Assessment of the "Golden Hour" in a North American Prospective Cohort<br/>Craig D. Newgard, Robert H. Schmicker, Jerris R. Hedges, John P. Trickett, Daniel P. Davis, Eileen M. Bulger, Tom P. Aufderheide, Joseph P. Minei, J. Steven Hata, K. Dean Gubler, Todd B. Brown, Jean-Denis Yelle, Berit Bardarson, Graham Nichol, Resuscitation Outcomes Consortium Investigators<br/>Annals of Emergency Medicine<br/>March 2010 (Vol. 55, Issue 3, Pages 235-246.e4)</p> | <b>March 1, 2010</b> | <p>Handling Missing Data: Study Design strategies to limit missing information<br/>"Pattern of Missingness" definition (MCAR, MAR, MNAR)<br/>Biostatistics (including Multiple imputation to deal with missing information)</p> <p>Advantages and Limitations of Registry Studies</p> <p>Basic definition of multivariable regression</p> | <p>Review of the history of medical helicopter transport<br/>Current debate over patient and crew safety on helicopters<br/>When is helicopter transport worth associated costs and risk</p> <p>Discussion on EMTALA</p> |                     |
| <p><b>The NHAMCS Database, Chart Review Methods, and More on Regression Modeling May 1, 2010</b><br/><b>Refers to Article below:</b></p> <p>Pregnancy Testing in Women of Reproductive Age in US Emergency Departments, 2002 to 2006: Assessment of a National Quality Measure<br/>Jeremiah D. Schuur, Sarah A. Tibbetts, Jesse M. Pines<br/>Annals of Emergency Medicine<br/>May 2010 (Vol. 55, Issue 5, Pages 449-457)</p>                                                                                                                                                                                                                                                  | <b>May 1, 2010</b>   | <p>NHAMCS survey: Sampling methods, 4 stage probability sampling; data collection and extraction<br/>8 BASIC ELEMENTS OF CHART REVIEW<br/>BIAS AND MEASUREMENT ERRORS SEEN IN NON- STANDARDIZED CHART REVIEWS</p> <p>DISCUSSION ON DATA RELIABILITY FROM NHAMCS EXTRACTION<br/>CHOOSING VARIABLES FOR REGRESSION MODELING</p>             | <p>CLINICAL REASONING WHY NO URINE PREG TESTS DOCUMENTED<br/>ED QUALITY MEASURES</p>                                                                                                                                     |                     |
| <p><b>Novel Biomarkers: Help or Hindrance to Patient Care in the Emergency Department? July 1, 2010</b><br/><b>Refers to Article below:</b></p> <p>The Diagnostic Accuracy of Plasma Neutrophil Gelatinase-Associated Lipocalin in the Prediction of Acute Kidney Injury in Emergency Department Patients With Suspected Sepsis</p>                                                                                                                                                                                                                                                                                                                                           | <b>July 1, 2010</b>  | <p>BAYESIAN APPROACH WITH BIOMARKERS</p> <p>WHY CAP SUM CONCLUSION AND ABSTRACT CONCLUSION OFTEN DIFFER<br/>ROC PLOTS</p>                                                                                                                                                                                                                 | <p>DEFINITION OF A BIOMARKER</p> <p>USEFULNESS OF BIOMARKERS IN THE ED<br/>ISSUE OF SPIN IN MEDICAL LITERATURE</p>                                                                                                       |                     |

**Table E1.**

**Annals Journal Club Issue (Questions printed in the listed issue with Answers printed 5 months following Questions)**

**Used with permission of Tyler Barrett, MD, MSCI; David Schriger, MD, MPH**

|                                                                                                                                                                                                                                                                                                                                                                                                                                                                                                                                                                                                                   | Month/Year               | Methodology/Statistics Topics                                                                                                                                                                                                | Clinical Topics                                                                                                                                                                         | Epidemiology Topics |
|-------------------------------------------------------------------------------------------------------------------------------------------------------------------------------------------------------------------------------------------------------------------------------------------------------------------------------------------------------------------------------------------------------------------------------------------------------------------------------------------------------------------------------------------------------------------------------------------------------------------|--------------------------|------------------------------------------------------------------------------------------------------------------------------------------------------------------------------------------------------------------------------|-----------------------------------------------------------------------------------------------------------------------------------------------------------------------------------------|---------------------|
| Nathan I. Shapiro, Stephen Trzeciak, Judd E. Hollander, Robert Birkhahn, Ronny Otero, Tiffany M. Osborn, Eugene Moretti, H. Bryant Nguyen, Kyle Gunnerson, David Milzman, David F. Gaieski, Munish Goyal, Charles B. Cairns, Kenneth Kupfer, Seok-Won Lee, Emanuel P. Rivers<br>Annals of Emergency Medicine<br>July 2010 (Vol. 56, Issue 1, Pages 52-59)                                                                                                                                                                                                                                                         |                          | CHOOSING CUT-OFFS FOR SCREENING AND CONFIRMATORY TESTS                                                                                                                                                                       | DIAGNOSING AND PREDICTING ACUTE RENAL FAILURE                                                                                                                                           |                     |
| <b>Does "not different" equal "the same?"</b><br><b>Refers to Article below:</b><br>Randomized Controlled Trial of Trimethoprim-Sulfamethoxazole for Uncomplicated Skin Abscesses in Patients at Risk for Community-Associated Methicillin-Resistant <i>Staphylococcus aureus</i> Infection<br>Gillian R. Schmitz, David Bruner, Rebecca Pitotti, Cameron Olderog, Timothy Livengood, Justin Williams, Kermit Huebner, Jeffrey Lightfoot, Brandon Ritz, Christopher Bates, Matthew Schmitz, Mihriye Mete, Gregory Deye et al.<br>Annals of Emergency Medicine<br>September 2010 (Vol. 56, Issue 1, Pages 283-287) | <b>September 1, 2010</b> | DISCUSSION ON DEFINING "OUTCOMES" AND "TREATMENT FAILURES"<br>SUPERIORITY VS. NON-INFERIORITY VS. EQUIVALENCE CLINICAL TRIALS<br>NULL HYPOTHESES IN THE 3 TYPE OF TRIALS                                                     | MANAGEMENT OF SKIN AND SOFT TISSUE INFECTION<br>EVIDENCE FOR USING ANTIBIOTICS IN SSTI<br>CA-MRSA IMPACT ON TREATMENT DECISIONS WITH ANTIBIOTICS                                        |                     |
| <b>Investigating Rare Events and a Discussion on Waiting Room Chest Pain Evaluations</b><br><b>Refers to Article below:</b><br>Safety of Assessment of Patients with Potential Ischemic Chest Pain in an Emergency Department Waiting Room: A Prospective Comparative Cohort Study.<br>Frank Scheuermeyer, MD, MHSc; James Christenson, MD; Grant Innes, MD et al                                                                                                                                                                                                                                                 | <b>November 1, 2010</b>  | BAYESIAN APPROACH TO STUDY DESIGN<br><br>INHERENT ASSUMPTIONS IN CONFIDENCE INTERVALS<br><br>MEASURING RARE EVENTS<br><br>DRAWING PROPER CONCLUSIONS ON STUDIES OF RARE EVENTS<br>CALCULATING A SAMPLE SIZE FOR A RARE EVENT | PROS AND CONS OF WAITING ROOM TREATMENT<br>IMPACT OF CROWDING ON RESIDENT EDUCATION<br>IMPACT OF CROWDING ON NURSE SATISFACTION<br><br>TREATMENT OF CHEST PAIN IN DIFFERENT ED SETTINGS |                     |

**Table E1.**

**Annals Journal Club Issue (Questions printed in the listed issue with Answers printed 5 months following Questions)**

**Used with permission of Tyler Barrett, MD, MSCI; David Schriger, MD, MPH**

|                                                                                                                                                                                       | Month/Year             | Methodology/Statistics Topics                                                                               | Clinical Topics                                                                                                                                                                                   | Epidemiology Topics |
|---------------------------------------------------------------------------------------------------------------------------------------------------------------------------------------|------------------------|-------------------------------------------------------------------------------------------------------------|---------------------------------------------------------------------------------------------------------------------------------------------------------------------------------------------------|---------------------|
| Annals of Emergency Medicine<br>November 2010 (Vol. 56, Issue 1, Pages 455-462)                                                                                                       |                        |                                                                                                             | ED METHODS FOR DEALING WITH CROWDING: GOOD OR BAD                                                                                                                                                 |                     |
| <b>To Shock or Not to Shock: That is the Question; is There an Answer?</b>                                                                                                            | <b>January 1, 2011</b> | INHERENT STRUCTURE OF A STUDY'S DATA AND UNIT OF ANALYSIS                                                   | VARIATIONS IN TREATMENT OF ATRIAL FIBRILLATION AND FLUTTER                                                                                                                                        |                     |
| <b>Refers to Article below:</b>                                                                                                                                                       |                        | MULTILEVEL MODELS AND NESTING                                                                               | DISCUSSION ON LEVEL OF EVIDENCE SUPPORTING TREATMENT VARIATIONS                                                                                                                                   |                     |
| Variation in Management of Recent-Onset Atrial Fibrillation and Flutter Among Academic Hospital Emergency Departments<br>Ian G. Stiell, Catherine M. Clement, Robert J. Brison et al. |                        | BACKWARD STEPWISE REGRESSION FOR CONSTRUCTING MODELS                                                        | PROS AND CONS OF TREATMENT VARIATION                                                                                                                                                              |                     |
| Annals of Emergency Medicine<br>January 2011 (Vol. 57, Issue 1, Pages 13-21)                                                                                                          |                        | DISCUSSION ON IMPORTANCE OF MEASURING OUTCOMES AT SENSIBLE TIME INTERVALS                                   | EVIDENCE FOR RATE VS. RHYTHM CONTROL IN ACUTE ATRIAL FIBRILLATION<br>DISCUSSION ON EPIDEMIOLOGY AND RISKS ASSOCIATED WITH A FIB<br>INTERNATIONAL DIFFERENCES IN DISPOSITION FOR A FIB AND SYNCOPE |                     |
| <b>Shining light on pupillary response after paralysis and the role of case series in clinical research</b>                                                                           | <b>March 1, 2011</b>   | REVIEW OF DIFFERENT OBSERVATIONAL STUDY DESIGNS (CASE REPORT, CASE SERIES, COHORT STUDY)                    | NEUROMUSCULAR BLOCKING DRUGS' IMPACT ON PUPILLARY RESPONSE                                                                                                                                        |                     |
| <b>Refers to Article below:</b>                                                                                                                                                       |                        | DEFINING "PROSPECTIVE" AND "RETROSPECTIVE"                                                                  | OTHER COMMON RSI DRUGS' IMPACT ON PUPILLARY RESPONSE                                                                                                                                              |                     |
| Pupillary Response to Light is Preserved in the Majority of Patients Undergoing Rapid Sequence Intubation.<br>David A. Caro, Steven Andescavage, Mohsen Akhlaghi et al.               |                        | CONSECUTIVE PATIENT SAMPLE VS. CONVENIENCE SAMPLE                                                           | PHYSIOLOGY OF NORMAL PUPILLARY RESPONSE                                                                                                                                                           |                     |
| Annals of Emergency Medicine<br>March 2011 (Vol. 57, Issue 3, Pages 234-239)                                                                                                          |                        | ADVANTAGES AND LIMITATIONS OF CASE SERIES STUDY DESIGN                                                      | APPROPRIATE TIME TO MEASURE PUPILLARY RESPONSE FOLLOWING MEDICATION                                                                                                                               |                     |
|                                                                                                                                                                                       |                        | CASE SERIES AND REPORTS WEIGHT OF EVIDENCE<br>HOW MIGHT CHOICE OF TOOL TO MEASURE OUTCOME IMPACT CONCLUSION |                                                                                                                                                                                                   |                     |

**Table E1.**

**Annals Journal Club Issue (Questions printed in the listed issue with Answers printed 5 months following Questions)**

**Used with permission of Tyler Barrett, MD, MSCI; David Schriger, MD, MPH**

|                                                                                                                                                                                                                                      | Month/Year         | Methodology/Statistics Topics | Clinical Topics | Epidemiology Topics |
|--------------------------------------------------------------------------------------------------------------------------------------------------------------------------------------------------------------------------------------|--------------------|-------------------------------|-----------------|---------------------|
| <b>May 2011 Journal Club Title</b>                                                                                                                                                                                                   | <b>May 1, 2011</b> |                               |                 |                     |
| <b>Refers to Article below:</b>                                                                                                                                                                                                      |                    |                               |                 |                     |
| A Randomized Controlled Trial of<br>Ketamine/Propofol Versus Propofol Alone for<br>Emergency Department Procedural Sedation<br>Henry David, Joseph Shipp<br>Annals of Emergency Medicine<br>May 2011 (Vol. 57, Issue 1, Pages YY-ZZ) |                    |                               |                 |                     |
